# Supplementary material for: Rice Bran Extract Suppresses High-Fat Diet-Induced Hyperlipidemia and Hepatosteatosis through Targeting AMPK and STAT3 Signaling
Source: MDPI journal article supplement (doi:10.3390/nu15163630), 2023-08-18
Supplement: s1 [file s1]

Supplementary Table S1: Comparison of Gamma-Oryzanol Concentration in Various Rice Bran Extracts.

**Comparison of Gamma-Oryzanol Concentration in Various Rice Bran Extracts**

| RBE No. | gamma-oryzanol<br>(mg/g) |
|---------|--------------------------|
| 1       | 0.4                      |
| 2       | 12.27                    |
| 3       | 0                        |
| 4       | 0                        |
| 5       | 0                        |
| 6       | 9.33                     |
| 7       | 0                        |
| 8       | 10.82                    |
| 9       | 0                        |
| 10      | 0                        |
| 11      | 0.75                     |
| 12      | 0                        |
| 13      | 11.09                    |
